# Supplementary material for: Relationship investigation of molecular structure–binding affinity of antibiotics to bovine serum albumin using flow injection chemiluminescence analysis and molecular docking
Source: Royal Society of Chemistry journal article supplement (doi:10.1039/c3ra45885g), 2013-12-02
Supplement: c3ra45885g.pdf [file c3ra45885g.pdf]

**Supporting Information**

**Relationship Investigation of Molecular Structure–Binding Affinity of Antibiotics to Bovine Serum  
Albumin Using Flow Injection Chemiluminescence Analysis and Molecular Docking**

Xijuan Tan and Zhenghua Song\*

*Key Laboratory of Synthetic and Natural Functional Molecule Chemistry of  
Ministry of Education, College of Chemistry and Materials Science, Northwest  
University, 229 North Taibai Road, Xi'an, Shaanxi Province, 710069, China*

Fax: +86-29-88302604; Tel: +86-29-88303798

Email: [songzhenghua@hotmail.com](mailto:songzhenghua@hotmail.com); [zhsong123@nwu.edu.cn](mailto:zhsong123@nwu.edu.cn)

## Contents

### 1. Fluorescence measurements

**Fig. S1** The schematic diagram of the present FI-CL system

R1: sample solution; R2: BSA solution; R3: luminol solution; R4: water carrier; P: peristaltic pump; V: six-way valve; M: mixing tubing; F: CL flow cell; PMT: photomultiplier tube; W: waste; PC: personal computer. Flow rate:  $2.0 \text{ mL} \cdot \text{min}^{-1}$ ; mixing tubing length: 5.0 cm; negative high voltage: 750 V.

**Fig. S2** Plots of  $\log[(I_0 - I)/I]$  vs  $\log C_{\text{Antibiotic}}$  and  $\log[(F_0 - F)/F]$  vs  $\log C_{\text{Antibiotic}}$  at 298 K

Panels (a) and (b) show  $\log[(I_0 - I)/I]$  vs  $\log C_{\text{Antibiotic}}$  and  $\log[(F_0 - F)/F]$  vs  $\log C_{\text{Antibiotic}}$ , respectively;

Curves 1–14 are plots for ERY, KIT, MID, JOM, ERE, JOP, MIA, TET, OXY, CHL, SNM, SGD, SDZ and SMZ, respectively.

**Fig. S3** Results of antibiotics to BSA docking analysis

Panels A–K show the three dimensional views of BSA binding with KIT, MID, JOS, ERE, JOP, MIA, OXY, CHL, SGD, SDZ and SMZ by Pymol, respectively. The residues of BSA are shown using line model and antibiotics are shown using stick-ball model. The black dashed lines are H-bonds.

Panels a–k show the two dimensional views of the corresponding hydrophobic interactions and H-bonds for BSA binding with KIT, MID, JOS, ERE, JOP, MIA, OXY, CHL, SGD, SDZ and SMZ by Ligplus, respectively. Residues and antibiotic atoms involved in hydrophobic interactions are marked with spokewise arcs and spokes, respectively. The olive green dashed lines refer to H-bonds.

**Table S1** Binding parameters of antibiotic to BSA at 288/308 K by FI-CL and FQ method

**Table S2** Results of  $\Delta G$  values of antibiotic to BSA at 288/308 K by FI-CL and FQ method

**Table S3** Residues of BSA towards functional groups at  $R_1 \sim R_4$  in macrolides

### Referees' concerns

## 1. Fluorescence measurements

The utilized F-4500 fluorophotometer in this work equipped with a 150 W xenon lamp and a 3.0 mL quartz cuvette with a path length of 1.0 cm. The slit widths of Ex/Em were fixed at 5.0 nm/5.0 nm. The negative high voltage of the PMT and the scanning rate were 700 V and 240 nm·min<sup>-1</sup>, respectively. A series of antibiotic solutions (within the range of  $5.0 \times 10^{-8} \sim 5.0 \times 10^{-6}$  mol·L<sup>-1</sup>, **Table S1**) was fortified into BSA solution ( $5.0 \times 10^{-7}$  mol·L<sup>-1</sup>). After the mixed solution was well homogenized, the fluorescence spectra of the mixture was recorded in the wavelength range of 290–450 nm with the Ex/Em of 280 nm/340 nm. Herein, the fluorescence intensity of BSA in the absence and presence of antibiotics were  $F_0$  and  $F$ , respectively.

It was found that all the studied antibiotics had quenching effect on the intrinsic fluorescence intensity of BSA, and the data were analyzed using double-logarithmic equation<sup>38,49–51</sup> of  $\log[(F_0 - F)/F] = \log K + n \log C_{\text{Antibiotic}}$ . The binding parameters  $K$  and  $n$  of antibiotics to BSA were given from the linear plots of  $\log[(F_0 - F)/F]$  vs  $\log C_{\text{Antibiotic}}$ , with results listed in **Table 2** (298 K) and **Table S1** (288/308 K).

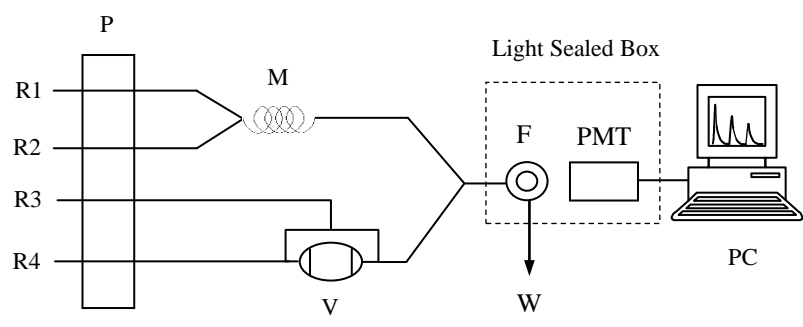

**Fig. S1**

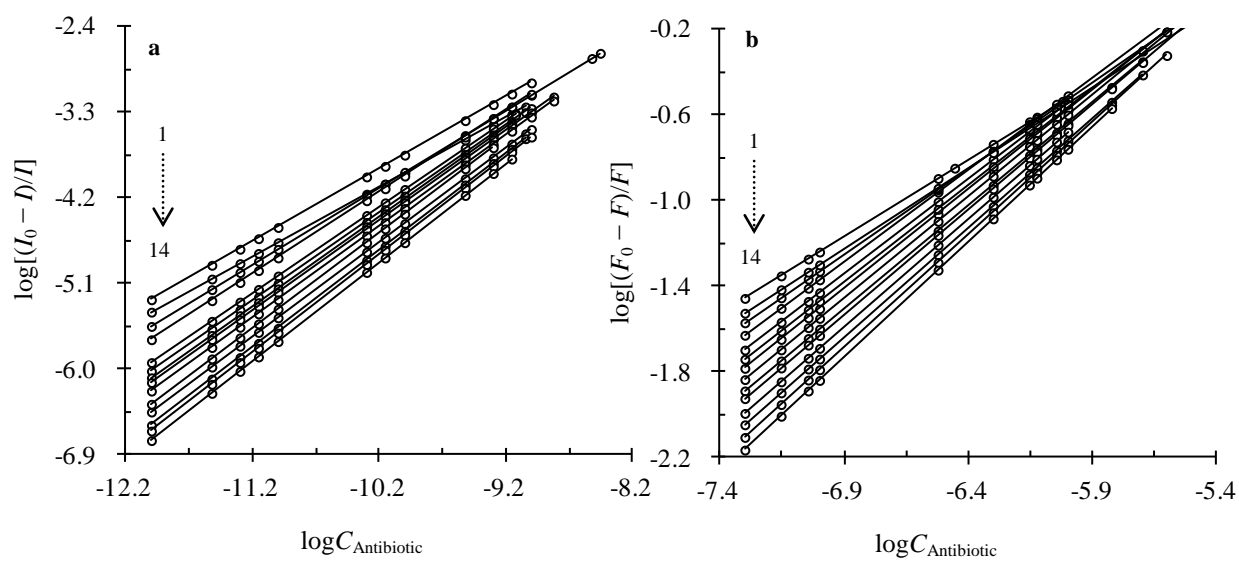

**Fig. S2**

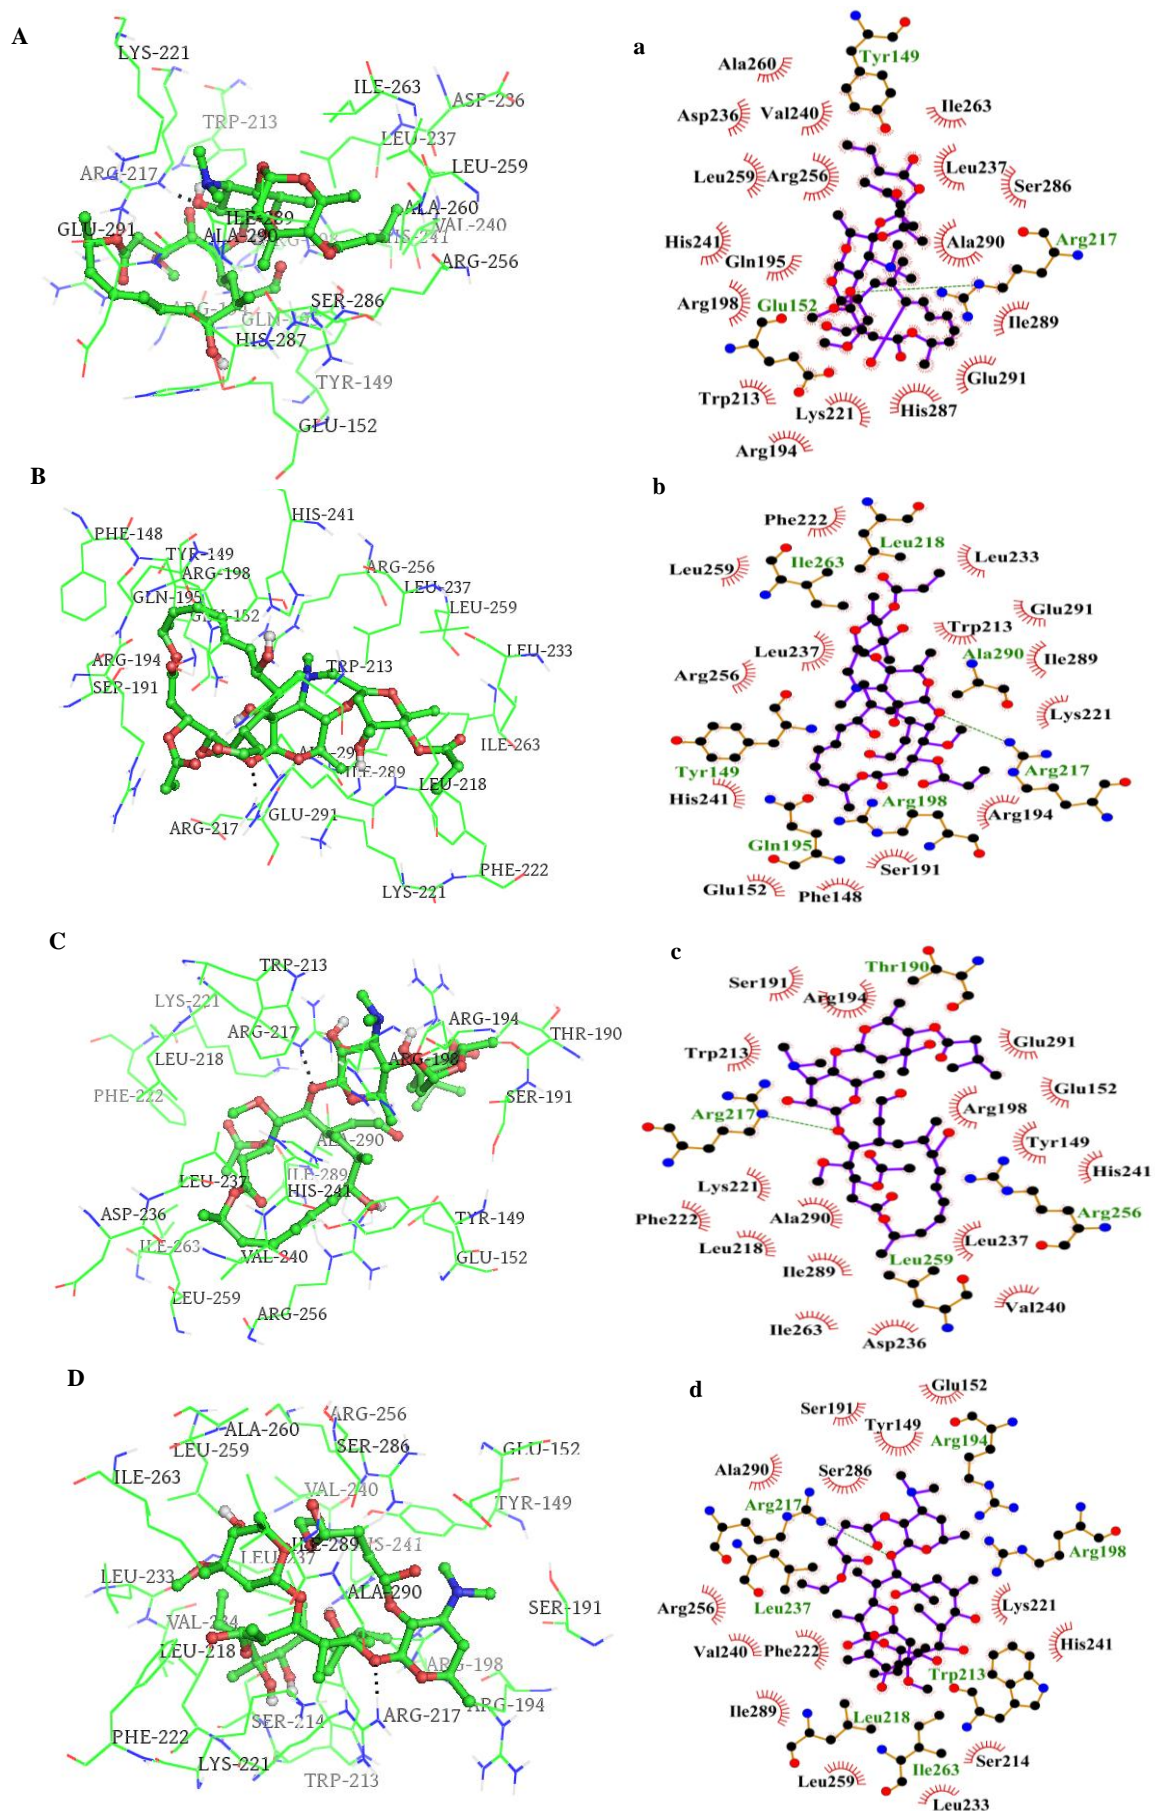

Fig. S3-1

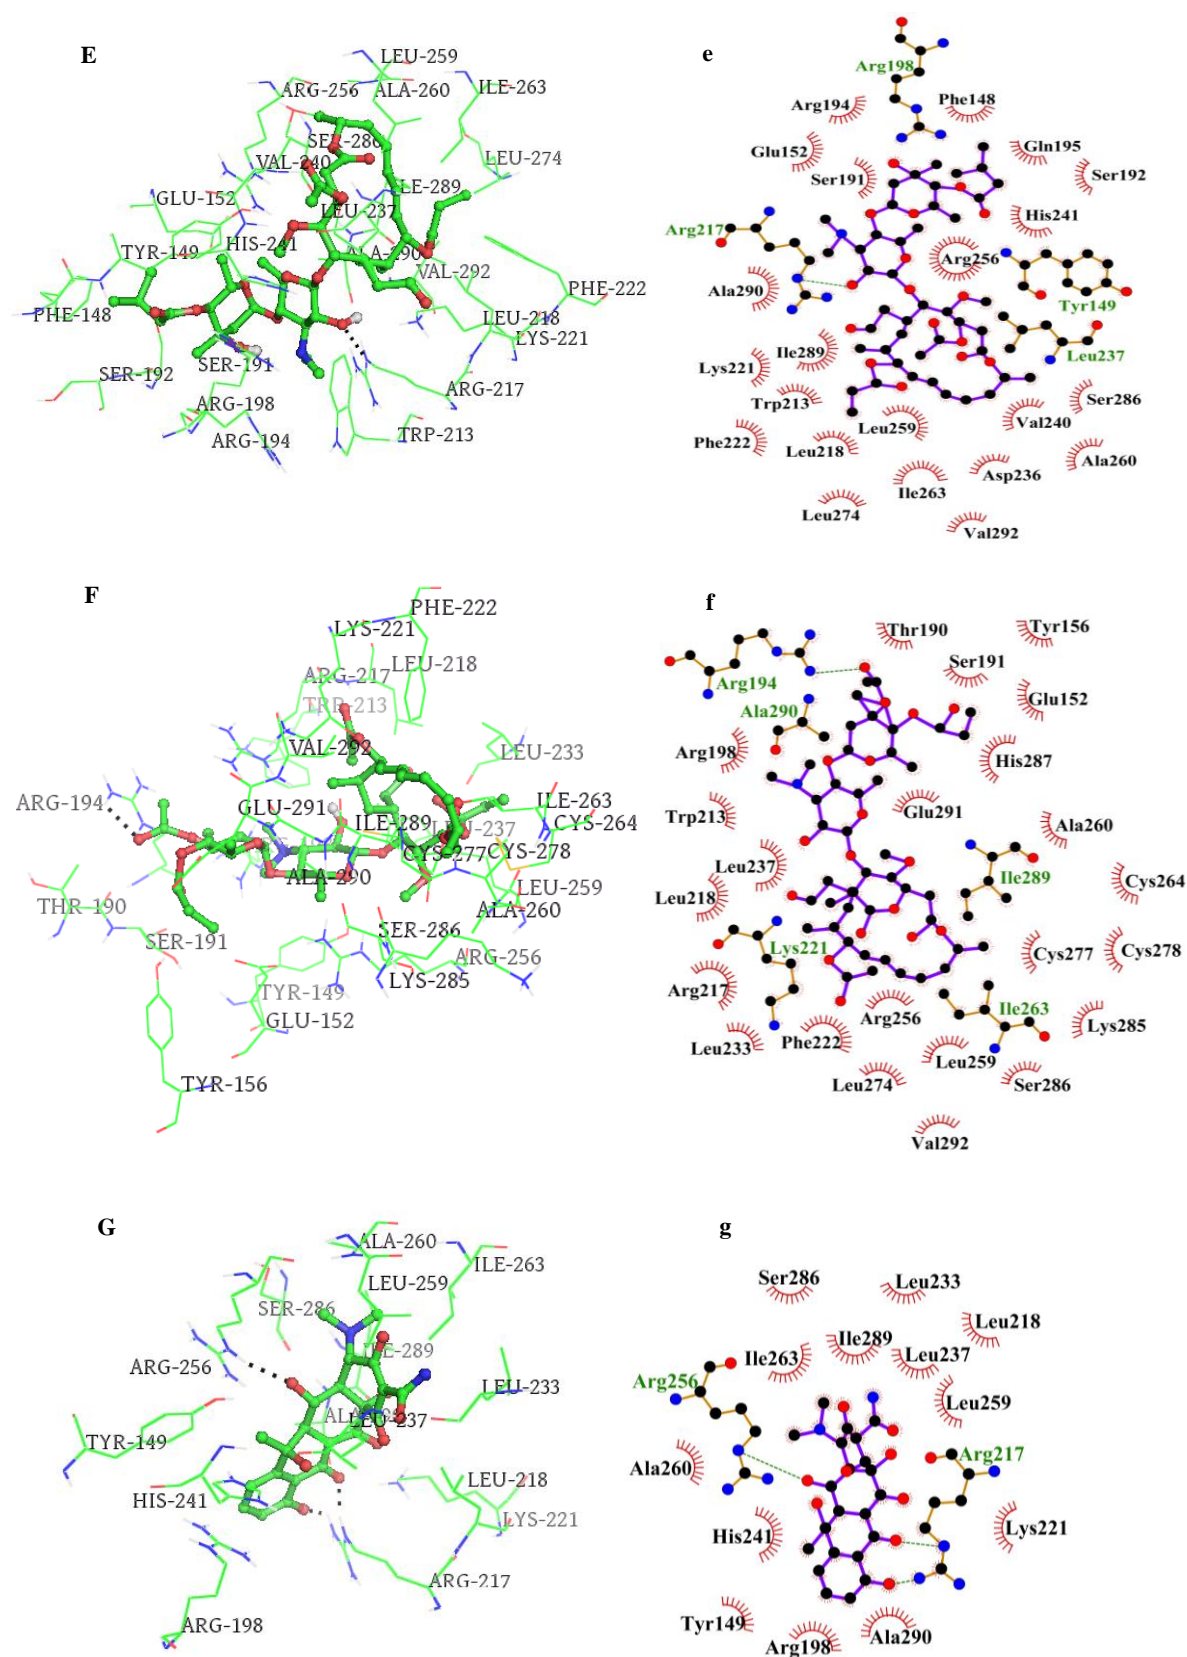

Fig. S3–2



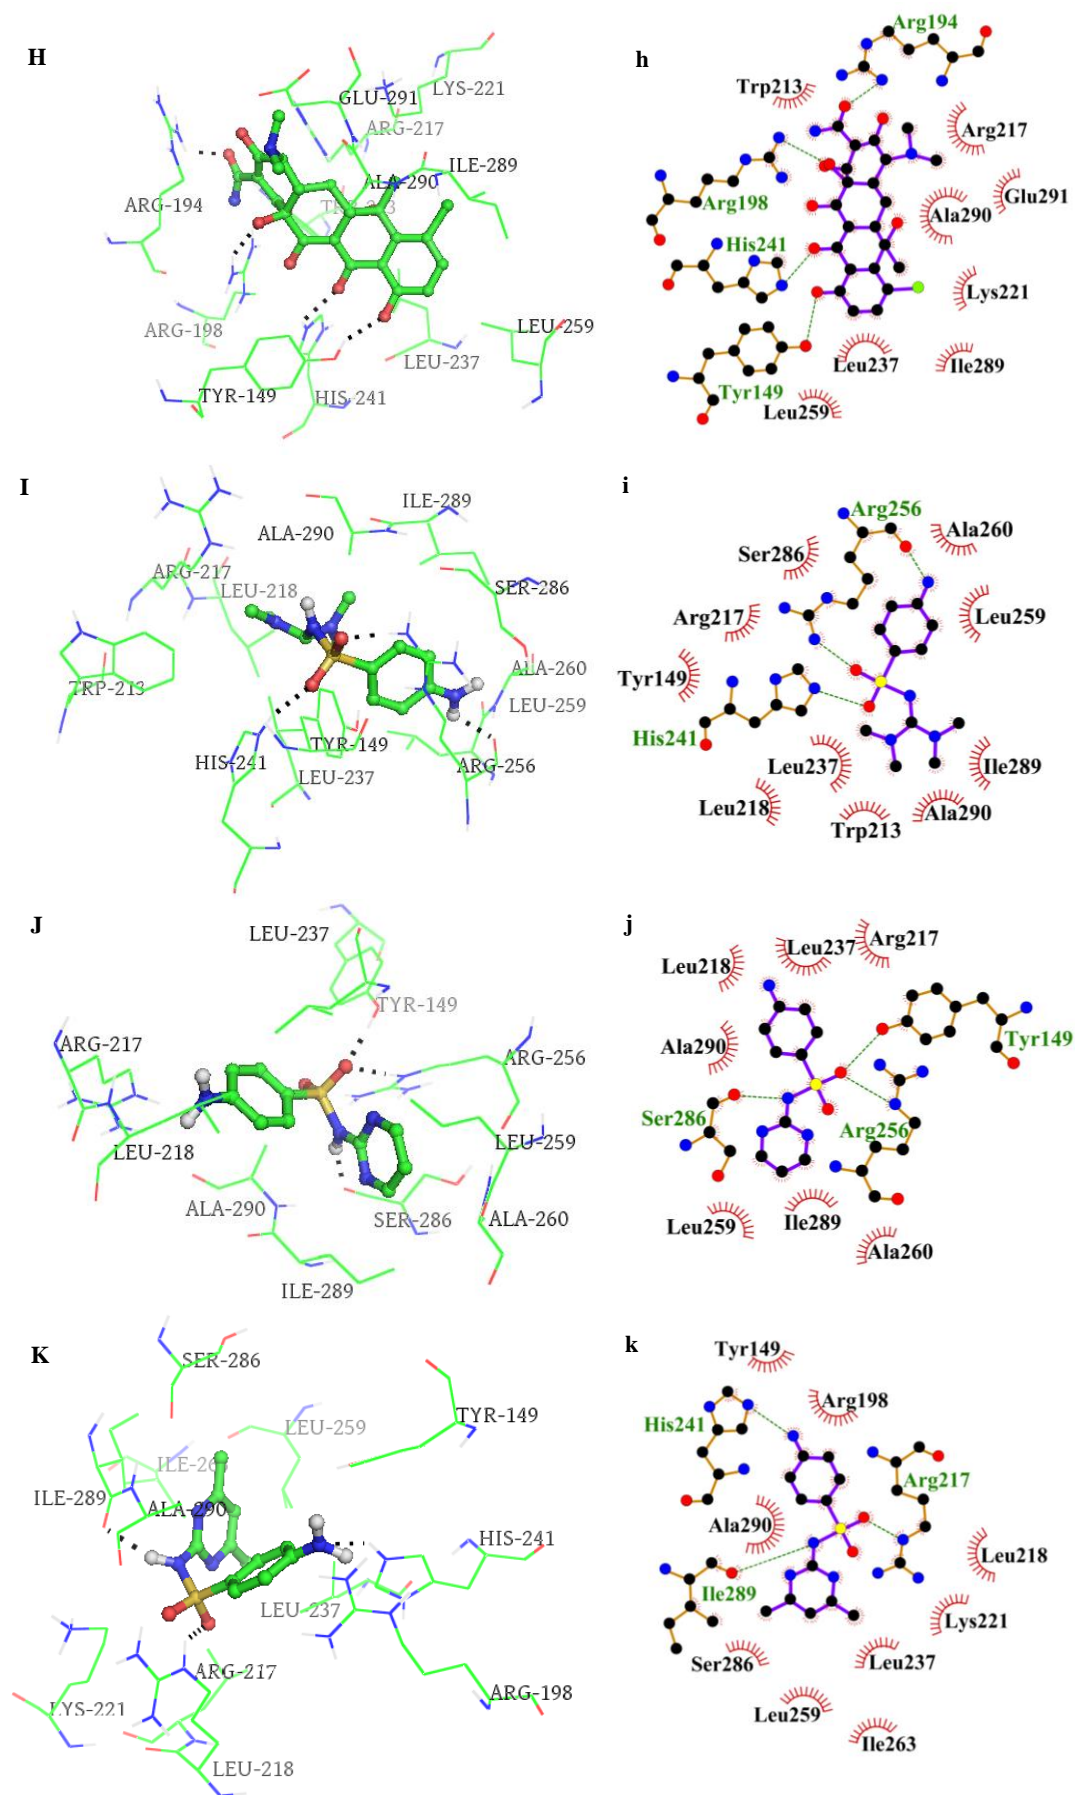

**Fig. S3-3**



**Table S1** Binding parameters of antibiotic to BSA at 288/308 K by FI-CL and FQ method

| Antibiotics | $K$ (L·mol <sup>-1</sup> )                  |                                             | $n$         |             | Linear range <sup>a</sup><br>(μmol·L <sup>-1</sup> ) |
|-------------|---------------------------------------------|---------------------------------------------|-------------|-------------|------------------------------------------------------|
|             | FI-CL / FQ                                  | FI-CL / FQ                                  | FI-CL / FQ  | FI-CL / FQ  |                                                      |
|             | (288 K)                                     | (308 K)                                     | (288 K)     | (308 K)     |                                                      |
| ERY         | 2.13×10 <sup>3</sup> / 2.15×10 <sup>3</sup> | 3.49×10 <sup>3</sup> / 3.52×10 <sup>3</sup> | 0.71 / 0.72 | 0.74 / 0.75 | 0.05 ~ 1.0                                           |
| KIT         | 6.06×10 <sup>3</sup> / 5.96×10 <sup>3</sup> | 1.02×10 <sup>4</sup> / 9.90×10 <sup>3</sup> | 0.75 / 0.74 | 0.79 / 0.77 | 0.05 ~ 3.0                                           |
| MID         | 1.04×10 <sup>4</sup> / 1.01×10 <sup>4</sup> | 1.86×10 <sup>4</sup> / 1.81×10 <sup>3</sup> | 0.80 / 0.78 | 0.83 / 0.82 | 0.05 ~ 3.5                                           |
| JOS         | 2.48×10 <sup>4</sup> / 2.50×10 <sup>4</sup> | 4.50×10 <sup>4</sup> / 4.72×10 <sup>3</sup> | 0.82 / 0.83 | 0.89 / 0.90 | 0.05 ~ 5.0                                           |
| ERE         | 4.79×10 <sup>4</sup> / 4.62×10 <sup>4</sup> | 8.93×10 <sup>4</sup> / 8.83×10 <sup>3</sup> | 0.88 / 0.87 | 0.92 / 0.91 | 0.05 ~ 1.0                                           |
| JOP         | 5.26×10 <sup>4</sup> / 5.06×10 <sup>4</sup> | 9.99×10 <sup>4</sup> / 9.79×10 <sup>4</sup> | 0.90 / 0.88 | 0.93 / 0.92 | 0.05 ~ 2.5                                           |
| MIA         | 5.88×10 <sup>4</sup> / 5.58×10 <sup>5</sup> | 1.25×10 <sup>5</sup> / 1.12×10 <sup>5</sup> | 0.92 / 0.90 | 0.95 / 0.93 | 0.05 ~ 2.5                                           |
| TET         | 3.57×10 <sup>5</sup> / 3.17×10 <sup>5</sup> | 1.29×10 <sup>5</sup> / 1.17×10 <sup>5</sup> | 0.97 / 0.96 | 0.94 / 0.94 | 0.05 ~ 3.5                                           |
| OXY         | 4.11×10 <sup>5</sup> / 4.01×10 <sup>5</sup> | 1.39×10 <sup>5</sup> / 1.36×10 <sup>5</sup> | 0.98 / 0.97 | 0.95 / 0.95 | 0.05 ~ 1.5                                           |
| CHL         | 4.28×10 <sup>5</sup> / 4.45×10 <sup>5</sup> | 1.42×10 <sup>5</sup> / 1.49×10 <sup>5</sup> | 0.99 / 1.00 | 0.96 / 0.96 | 0.05 ~ 3.0                                           |
| SNM         | 4.35×10 <sup>5</sup> / 4.51×10 <sup>5</sup> | 3.72×10 <sup>5</sup> / 3.76×10 <sup>5</sup> | 0.99 / 1.02 | 0.97 / 0.99 | 0.05 ~ 1.0                                           |
| SGD         | 5.35×10 <sup>5</sup> / 5.05×10 <sup>5</sup> | 4.41×10 <sup>5</sup> / 4.11×10 <sup>5</sup> | 1.02 / 1.03 | 0.99 / 1.00 | 0.05 ~ 2.0                                           |
| SDZ         | 6.32×10 <sup>5</sup> / 6.48×10 <sup>5</sup> | 5.05×10 <sup>5</sup> / 5.15×10 <sup>5</sup> | 1.05 / 1.07 | 1.02 / 1.04 | 0.05 ~ 2.5                                           |
| SMZ         | 6.89×10 <sup>5</sup> / 7.14×10 <sup>5</sup> | 5.42×10 <sup>5</sup> / 5.52×10 <sup>5</sup> | 1.06 / 1.10 | 1.03 / 1.05 | 0.05 ~ 1.5                                           |

<sup>a</sup> The shown linear ranges of antibiotics were used in FQ study.

**Table S2** Results of  $\Delta G$  values of antibiotic to BSA at 288/308 K by FI-CL and FQ method <sup>a</sup>

| Antibiotics | FI-CL  |        | FQ     |        |
|-------------|--------|--------|--------|--------|
|             | 288 K  | 308 K  | 288 K  | 308 K  |
| ERY         | -18.35 | -20.89 | -18.37 | -20.91 |
| KIT         | -20.85 | -23.64 | -20.81 | -23.56 |
| MID         | -22.15 | -25.18 | -22.08 | -25.10 |
| JOS         | -24.23 | -27.44 | -24.24 | -27.56 |
| ERE         | -25.81 | -29.19 | -25.72 | -29.16 |
| JOP         | -26.03 | -29.46 | -25.93 | -29.43 |
| MIA         | -26.30 | -30.05 | -26.17 | -29.77 |
| TET         | -30.61 | -30.13 | -30.33 | -29.88 |
| OXY         | -30.95 | -30.32 | -30.89 | -30.27 |
| CHL         | -31.05 | -30.38 | -31.14 | -30.50 |
| SNM         | -31.09 | -32.84 | -31.17 | -32.87 |
| SGD         | -31.58 | -33.28 | -31.44 | -33.10 |
| SDZ         | -31.98 | -33.63 | -32.04 | -33.68 |
| SMZ         | -32.19 | -33.82 | -32.27 | -33.85 |

<sup>a</sup> The unit of  $\Delta G$  is  $\text{kJ}\cdot\text{mol}^{-1}$ .

**Table S3** Residues of BSA towards functional groups at R<sub>1</sub> ~ R<sub>4</sub> in macrolides <sup>a</sup>

| Antibiotics |   | Residues of BSA                                                                                             |
|-------------|---|-------------------------------------------------------------------------------------------------------------|
| ERY         | – |                                                                                                             |
| KIT         |   | Val240, Arg256, Leu237 and Ile263                                                                           |
| MID         |   | Arg194, Phe222, Leu233, Glu291 and Trp213                                                                   |
| JOS         |   | Thr190, Leu218, Lys221, Phe222, Ala290 and Glu291                                                           |
| ERE         |   | Ser191, Phe222, Leu237, Val240, Arg256, Ser286 and Ala290                                                   |
| JOP         |   | Phe148, Ser192, Gln195, Trp213, Leu218, Lys221, Phe222, His241,<br>Leu259, Ser286 and Ile289                |
| MIA         |   | Glu152, Tyr156, Thr190, Ser191, Phe222, Leu233, Arg256, Leu29,<br>Leu274, His287, Ala290, Glu291 and Val292 |

<sup>a</sup> Residues involved in hydrophobic interaction.

## Referees' concerns

### Concern 1:

In this work, the linear equation is  $\Delta I = A \log C_{\text{Antibiotic}} + B$ , with corresponding antibiotic concentration linear ranges from 1.0 to 5000  $\text{pmol} \cdot \text{L}^{-1}$  (see **Table 1**); the homemade FI-CL model, the linear equation is  $\log[(I_0 - I)/I] = \log K + n \log C_{\text{Antibiotic}}$ , with corresponding antibiotic concentration linear ranges from 1.0 to 3500  $\text{pmol} \cdot \text{L}^{-1}$  (see **Table 2**), and the binding constant  $K$  could be obtained from the intercept  $\log K$ .

By taking ERY to BSA as an example, the linear plots of  $\Delta I$  vs  $\log C_{\text{Antibiotic}}$  ( $\text{pmol} \cdot \text{L}^{-1}$ ) and  $\log[(I_0 - I)/I]$  vs  $\log C_{\text{Antibiotic}}$  ( $\text{mol} \cdot \text{L}^{-1}$ ) are shown in the following figures **A** and **B** (correlation coefficient  $r > 0.99$ ), respectively; and the  $K$  of  $2.30 \times 10^3 \text{ L} \cdot \text{mol}^{-1}$  for ERY to BSA could be obtained from the intercept ( $\log K$ : 3.36).

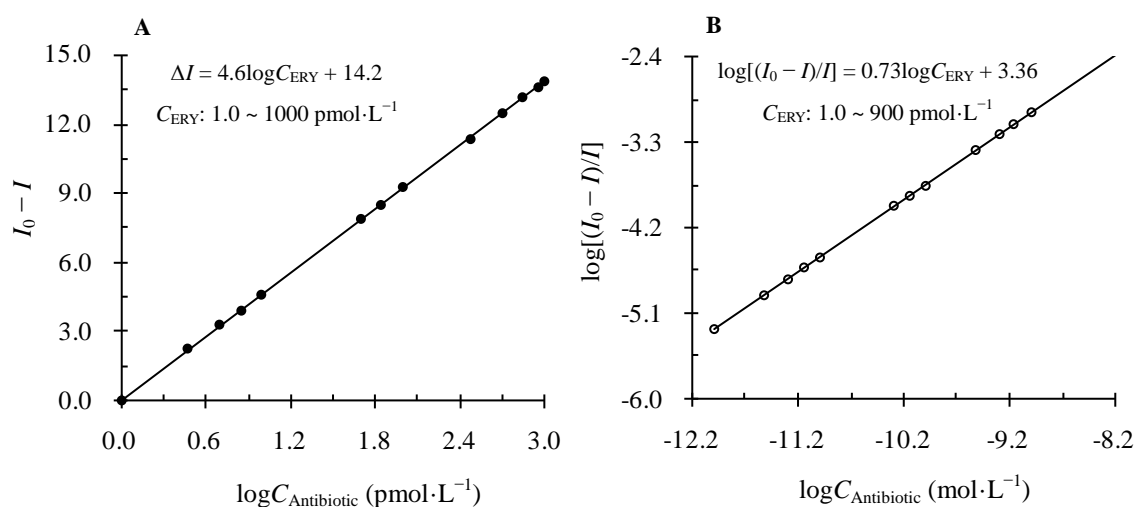

### Concern 2:

It is known that AutoDock 4.2 is a popular tool to predict and model protein–ligand interaction offering visual results with good docking accuracy and reliability (the evaluation about AutoDock 4.2 can be got by the link of <http://autodock.scripps.edu/> and refs of A. P. Norgan, et al., *J. Cheminformatics*, **2011**, 3, 12; S. F. Sousa, et al.,

*Proteins*, **2006**, 65, 15). For example, the binding sites and modes of BSA, marine alkaline protease and human serum albumin–ligands interactions have been reported by the refs: N. Dash, et al., *J. Pharmaceut. Biomed. Anal.*, **2013**, 77, 55; X. F. Ji, et al., *J. Mol. Graph. Model.*, **2013**, 46, 125; A. Garg, et al., *PLoS One*, **2013**, 8, e63805; D. Xiao, et al., *J. Lumin.*, **2014**, 146, 218; the description about the H-bond about BSA–ligand interaction has been discussed by the refs: M. Sarkar, et al., *J. Lumin.*, **2013**, 142, 220; X. Zhang, et al., *PLoS One*, **2013**, 8, e59106; H. L. Xu, et al., *Int. J. Mol. Sci.*, **2013**, 14, 14185; N. Shahabadi and S. M. Fili, *Spectrochim. Acta A: Mol. Biomol. Spectrosc.*, **2014**, 118, 422.

### Concern 3:

It is a fact that chemiluminescence analysis and fluorescence spectroscopy are very different.

Based on the **intrinsic fluorescence of BSA** ( $\lambda_{\text{Ex}}/\lambda_{\text{Em}} = 280 \text{ nm}/340 \text{ nm}$ ), the FQ equation,  $\log[(F_0 - F)/F] = \log K + n \log C_{\text{Antibiotic}}$ , corresponded to the antibiotic concentration linear ranges between **0.05 and 5.0  $\mu\text{mol} \cdot \text{L}^{-1}$**  (see **Table S1**).

Based on the **chemiluminescence from luminol with BSA reaction**, the linear equation,  $\log[(I_0 - I)/I] = \log K + n \log C_{\text{Antibiotic}}$ , corresponded to the antibiotic concentration linear ranges between **1.0 and 3500  $\text{pmol} \cdot \text{L}^{-1}$**  (see **Table 2**).

It is clear that the **binding constants  $K$**  of antibiotics to BSA by FQ and the proposed method have no significant differences; and the sensitivity of this proposed FI-CL procedure is higher than that of FQ method at least three orders of magnitudes.

**The details about the derivation of the homemade FI-CL model are given as follows:**

Luminol and protein form the complex of  $P \cdots L^*$  ( $P$ : protein,  $L$ : luminol) which produces the steady CL

intensity; the process is expressed as

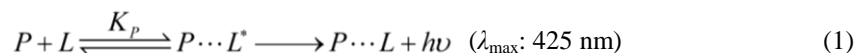

where  $K_p$  is the binding constant of protein with luminol.

In the presence of ligand, the interaction of protein and ligand leads to the formation of a ternary complex

$D_n \cdots P \cdots L$  ( $D$  refers to the ligand), with the binding process described as

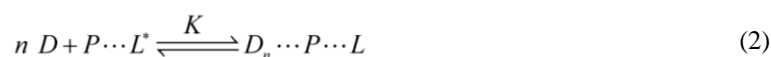

where  $K$  and  $n$  are the binding constant and the number of binding sites of ligand to protein, respectively.

Herein, the  $K$  can be expressed as

$$K = \frac{[D_n \cdots P \cdots L]}{[D]^n [P \cdots L^*]} \quad (3)$$

which equals to

$$K[D]^n = \frac{[D_n \cdots P \cdots L]}{[P \cdots L^*]} \quad (4)$$

According to chemical reaction equilibrium theory

$$[P \cdots L^*]_0 = [D_n \cdots P \cdots L] + [P \cdots L^*] \quad (5)$$

Using equations (4) and (5), there is

$$K[D]^n = \frac{[P \cdots L^*]_0 - [P \cdots L^*]}{[P \cdots L^*]} \quad (6)$$

Taking logarithms of both sides, the following equation is given

$$\log K + n \log [D] = \log \frac{[P \cdots L^*]_0 - [P \cdots L^*]}{[P \cdots L^*]} \quad (7)$$

$D_n \cdots P \cdots L$  does not emit photon, the mole fraction of unassociated luminol–protein is then expressed by the

corresponding CL intensity

$$\frac{I}{I_0} = \frac{[P \cdots L^*]}{[P \cdots L^*]_0} \quad (8)$$

Equation (8) equals to

$$\frac{I_0 - I}{I} = \frac{[P \cdots L^*]_0 - [P \cdots L^*]}{[P \cdots L^*]} \quad (9)$$



By substituting equation (9) into equation (7), the homemade FI-CL model is obtained

$$\log \frac{I_0 - I}{I} = \log K + n \log [D] \quad (10)$$

where the  $K$  and  $n$  are the binding constant and the number of binding sites of protein with ligand, the  $I_0$  and  $I$  are the CL intensity from luminol–protein system in the absence and presence of ligand, and  $[D]$  is the ligand concentration.

By plotting  $\log[(I_0 - I)/I]$  against  $\log[D]$ , the binding constant  $K$  could be obtained from the intercept  $\log K$ .

This work with homemade FI-CL model was published in *Analyst*, **2010**, 135, 2546 and *Talanta*, **2010**, 83, 312.
